# Supplementary material
Source: PubMed Central journal article supplement (PMC2704416)
Supplement: supp_181_1-2_E19_v2_1.pdf [file supp_181_1-2_E19_v2_1.pdf]

**Appendix 1: List of drugs contained within each drug class**

- Anticoagulants: acenocoumarol, dicoumarol, warfarin
- Thienopyridine antiplatelet agents: clopidogrel, ticlopidine
- Nitroglycerin: nitroglycerin, isosorbide dinitrate, isosorbide mononitrate
- Sublingual nitroglycerin: tablets, spray
- $\beta$ -Blockers: acebutolol, atenolol, bisoprolol, carvedilol, labetalol, metoprolol, nadolol, oxprenolol, pindolol, propranolol, sotalol, timolol
- Calcium antagonists: amlodipine, diltiazem, felodipine, nicardipine, nifedipine, nimodipine, verapamil
- Angiotensin-converting-enzyme inhibitors: benazepril, captopril, cilazapril, enalapril, fosinopril, lisinopril, perindopril, quinapril, ramipril, trandolapril
- Angiotensin-receptor blockers: candesartan, eprosartan, irbesartan, losartan, telmisartan, valsartan
- Diuretics: amiloride, bendroflumethiazide, bumetanide, chlorthalidone, ethacrynic acid, furosemide, hydrochlorothiazide, indapamide, methyclothiazide, metolazone, spironolactone, torsemide, triamterene
- Statins: atorvastatin, cerivastatin, fluvastatin, lovastatin, pravastatin, rosuvastatin, simvastatin
