# Supplementary material
Source: PubMed Central journal article supplement (PMC2704416)
Supplement: supp_181_1-2_E19_v2_2.pdf [file supp_181_1-2_E19_v2_2.pdf]

**Appendix 2** (as supplied by the authors): Cardiovascular drug expenditures by drug class by province per 100 000 population

|                  | British Columbia |            | Alberta   |            | Saskatchewan |            | Manitoba  |            | Ontario   |            | Quebec    |            | New Brunswick |            | Nova Scotia |            | PEI and NFLND |            |
|------------------|------------------|------------|-----------|------------|--------------|------------|-----------|------------|-----------|------------|-----------|------------|---------------|------------|-------------|------------|---------------|------------|
|                  | 1996             | 2006       | 1996      | 2006       | 1996         | 2006       | 1996      | 2006       | 1996      | 2006       | 1996      | 2006       | 1996          | 2006       | 1996        | 2006       | 1996          | 2006       |
| <b>AC</b>        | 128,150          | 264,965    | 119,041   | 253,733    | 179,784      | 293,433    | 102,660   | 239,924    | 108,731   | 239,746    | 123,501   | 276,710    | 121,402       | 266,887    | 113,961     | 252,193    | 110,764       | 218,882    |
| <b>NTG</b>       | 160,230          | 146,851    | 142,652   | 108,715    | 161,908      | 170,618    | 137,965   | 195,971    | 101,949   | 177,437    | 307,825   | 162,276    | 360,084       | 285,286    | 401,702     | 278,542    | 403,911       | 228,978    |
| <b>SLNTG</b>     | 37,354           | 33,058     | 28,894    | 28,409     | 39,320       | 30,968     | 33,056    | 38,332     | 60,462    | 48,310     | 63,713    | 53,310     | 51,010        | 45,536     | 60,923      | 49,543     | 49,777        | 43,628     |
| <b>BB</b>        | 450,843          | 1,004,263  | 360,352   | 817,974    | 552,431      | 901,106    | 433,795   | 1,067,815  | 637,872   | 1,069,115  | 821,107   | 1,399,598  | 841,316       | 1,554,134  | 1,068,092   | 1,630,378  | 1,005,620     | 1,348,143  |
| <b>CA</b>        | 1,169,995        | 2,096,357  | 979,905   | 2,389,951  | 1,410,439    | 2,372,555  | 1,070,303 | 2,511,053  | 1,966,033 | 3,093,676  | 1,902,644 | 3,313,032  | 2,058,878     | 3,434,710  | 2,192,133   | 3,367,228  | 1,995,750     | 2,632,856  |
| <b>ACEI</b>      | 1,088,793        | 3,114,894  | 1,044,995 | 2,798,566  | 1,430,793    | 2,964,856  | 1,183,923 | 2,744,954  | 1,509,317 | 3,516,731  | 1,248,024 | 2,664,596  | 1,458,064     | 4,452,873  | 1,800,059   | 4,093,454  | 2,238,549     | 4,345,734  |
| <b>ARB</b>       | 21,313           | 1,468,893  | 44,921    | 2,223,403  | 54,974       | 1,965,832  | 59,572    | 1,824,708  | 42,907    | 1,854,325  | 64,238    | 2,688,478  | 12,958        | 1,477,114  | 50,730      | 2,199,344  | 17,345        | 1,302,375  |
| <b>DIURETICS</b> | 256,274          | 729,392    | 325,684   | 693,478    | 653,618      | 923,766    | 342,669   | 893,242    | 396,807   | 714,734    | 614,888   | 1,031,933  | 470,094       | 894,595    | 642,375     | 972,408    | 694,401       | 903,120    |
| <b>STATIN</b>    | 795,780          | 4,453,515  | 641,126   | 4,986,063  | 631,854      | 3,617,092  | 752,443   | 4,563,079  | 1,319,461 | 6,537,014  | 1,534,194 | 7,606,340  | 1,017,151     | 7,048,932  | 984,424     | 6,958,443  | 886,025       | 5,718,295  |
| <b>AP</b>        | 86,539           | 660,381    | 52,448    | 614,687    | 93,489       | 821,324    | 120,275   | 1,065,093  | 88,621    | 815,443    | 45,067    | 870,444    | 96,108        | 1,020,444  | 122,925     | 863,478    | 159,377       | 803,053    |
| <b>TOTAL</b>     | 4,195,270        | 13,972,566 | 3,740,018 | 14,914,979 | 5,208,608    | 14,061,549 | 4,236,661 | 15,144,171 | 6,232,161 | 18,066,530 | 6,725,201 | 20,066,717 | 6,487,064     | 20,480,509 | 7,437,324   | 20,665,013 | 7,561,518     | 17,545,064 |

Source: IMS Health Canada, Canadian CompuScript Audit®.

Note: AC = anticoagulants; AP = thienopyridine antiplatelets; NTG = nitroglycerin; SL = sublingual; BB =  $\beta$ -blockers; CA = calcium antagonists; ACEI = angiotensin-converting-enzyme inhibitors; ARB = angiotensin-receptor antagonists.
